# Supplementary material
Source: PubMed Central journal article supplement (PMC3798985)
Supplement: cn400097j_si_001.pdf [file cn400097j_si_001.pdf]

## Supplementary Information

**Table S1**

Summary of results for agonist-activated  $\Delta I$  and  $\Delta F$  responses at unlabeled and MTSR-labeled  $\alpha 1$ -R19'C and  $\alpha 3$ -R19'C GlyRs. Electrophysiological and fluorescence data are shown in normal and bold type, respectively.

| Agonist          | Construct                                                       | EC <sub>50</sub> ( $\mu$ M)         | n <sub>H</sub>                  | I <sub>max</sub> ( $\mu$ A) | $\Delta F_{max}$ (%)            | $\frac{\Delta F_{half\ decay\ time}}{\Delta I_{half\ decay\ time}}$ | n         |
|------------------|-----------------------------------------------------------------|-------------------------------------|---------------------------------|-----------------------------|---------------------------------|---------------------------------------------------------------------|-----------|
| glycine          | $\alpha 3$ -WT unlabeled                                        | 74 $\pm$ 2                          | 2.9 $\pm$ 0.2                   | 5.4 $\pm$ 0.6               | -                               | -                                                                   | 6         |
|                  | $\alpha 3$ -WT labeled                                          | 71 $\pm$ 2                          | 2.9 $\pm$ 0.2                   | 5.6 $\pm$ 0.5               | -                               | -                                                                   | 6         |
|                  | <b><math>\alpha 3</math>-WT labeled <math>\Delta F</math></b>   | -                                   | -                               | -                           | <b>0</b>                        | -                                                                   | <b>6</b>  |
|                  | $\alpha 3$ -19'C unlabeled                                      | 12700 $\pm$ 600a                    | 1.4 $\pm$ 0.1a                  | 1.7 $\pm$ 0.1a              | -                               | -                                                                   | 7         |
|                  | $\alpha 3$ -19'C labeled                                        | 1740 $\pm$ 270ab                    | 1.2 $\pm$ 0.1a                  | 3.1 $\pm$ 0.3a              | -                               | 5.1 $\pm$ 1.0                                                       | 13        |
|                  | <b><math>\alpha 3</math>-19'C labeled <math>\Delta F</math></b> | <b>1340 <math>\pm</math> 210</b>    | <b>1.1 <math>\pm</math> 0.1</b> | -                           | <b>5.4 <math>\pm</math> 0.5</b> | -                                                                   | <b>13</b> |
|                  | $\alpha 1$ -WT unlabeled                                        | 17.9 $\pm$ 1.5a                     | 2.8 $\pm$ 0.1                   | 4.8 $\pm$ 0.4               | -                               | -                                                                   | 4         |
|                  | $\alpha 1$ -WT labeled                                          | 17.1 $\pm$ 0.6a                     | 2.8 $\pm$ 0.2                   | 4.9 $\pm$ 0.7               | -                               | -                                                                   | 4         |
|                  | <b><math>\alpha 1</math>-WT labeled <math>\Delta F</math></b>   | -                                   | -                               | -                           | <b>0</b>                        | -                                                                   | <b>4</b>  |
|                  | $\alpha 1$ -19'C unlabeled                                      | 4320 $\pm$ 220a                     | 1.3 $\pm$ 0.1a                  | 2.3 $\pm$ 0.4a              | -                               | -                                                                   | 5         |
|                  | $\alpha 1$ -19'C labeled                                        | 499 $\pm$ 79ab                      | 1.2 $\pm$ 0.2a                  | 3.6 $\pm$ 0.6a              | NA                              | 1.0 $\pm$ 0.1                                                       | 6         |
|                  | <b><math>\alpha 1</math>-19'C labeled <math>\Delta F</math></b> | <b>1110 <math>\pm</math> 100c</b>   | <b>1.0 <math>\pm</math> 0.1</b> | -                           | <b>23 <math>\pm</math> 4</b>    | -                                                                   | <b>6</b>  |
| $\beta$ -alanine | $\alpha 3$ -19'C labeled                                        | 2610 $\pm$ 940a                     | 1.5 $\pm$ 0.3a                  | 0.4 $\pm$ 0.05a             | NA                              | 4.7 $\pm$ 0.7                                                       | 5         |
|                  | <b><math>\alpha 3</math>-19'C labeled <math>\Delta F</math></b> | <b>22100 <math>\pm</math> 2300c</b> | <b>1.1 <math>\pm</math> 0.1</b> | -                           | <b>2.6 <math>\pm</math> 0.5</b> | -                                                                   | <b>5</b>  |
| taurine          | $\alpha 3$ -19'C labeled                                        | -                                   | -                               | 0.03 $\pm$ 0.01a            | -                               | -                                                                   | 5         |
|                  | <b><math>\alpha 3</math>-19'C labeled <math>\Delta F</math></b> | <b>5990 <math>\pm</math> 780</b>    | <b>1.3 <math>\pm</math> 0.4</b> | -                           | <b>1.3 <math>\pm</math> 0.2</b> | -                                                                   | <b>5</b>  |

*a* - significant difference to electrophysiological properties of glycine-activated unlabeled  $\alpha 3$ -WT GlyRs (Student's t-test,  $p < 0.05$ )

*b* - significant difference to electrophysiological properties before labeling in the same mutant GlyR (Student's t-test,  $p < 0.05$ )

*c* - significant difference of fluorescence properties to electrophysiological properties after labeling in the same mutant GlyR (Student's t-test,  $p < 0.05$ )

$\alpha 1$ -WT data are reproduced from (36)

**Table S2**

Summary of results for glycine-activated  $\Delta I$  and  $\Delta F$  responses at chimeric and double mutant GlyRs incorporating MTSR labels at R19°C. Electrophysiological and fluorescence data are shown in normal and bold type, respectively.

| Construct                | EC <sub>50</sub> (μM) | n <sub>H</sub>    | I <sub>max</sub> (μA) | ΔF <sub>max</sub> (%) | ΔF / ΔI half decay time | n        |
|--------------------------|-----------------------|-------------------|-----------------------|-----------------------|-------------------------|----------|
| Chi1 unlabeled           | 2880 ± 390            | 3.2 ± 0.2         | 1.6 ± 0.5             | -                     | -                       | 5        |
| Chi1 labeled             | 860 ± 490             | 1.1 ± 0.1         | 2.4 ± 0.5             | -                     | 3.2 ± 0.3b              | 5        |
| <b>Chi1 ΔF</b>           | <b>1450 ± 310</b>     | <b>1.3 ± 0.2</b>  | -                     | <b>2.3 ± 0.2b</b>     |                         | <b>5</b> |
| Chi2 unlabeled           | 2330 ± 520            | 2.7 ± 0.1         | 3.2 ± 0.4             | -                     | -                       | 5        |
| Chi2 labeled             | 530 ± 160             | 1.1 ± 0.01        | 2.6 ± 0.4             | -                     | 4.2 ± 0.8b              | 6        |
| <b>Chi2 ΔF</b>           | <b>970 ± 350</b>      | <b>0.9 ± 0.3</b>  | -                     | <b>4.8 ± 0.2b</b>     |                         | <b>6</b> |
| Chi3 unlabeled           | 5710 ± 1020           | 1.3 ± 0.1         | 1.4 ± 0.1             | -                     | -                       | 5        |
| Chi3 labeled             | 610 ± 30              | 1.8 ± 0.2         | 3.0 ± 0.2             | -                     | 1.0 ± 0.1a              | 6        |
| <b>Chi3 ΔF</b>           | <b>1000 ± 190</b>     | <b>1.3 ± 0.1</b>  | -                     | <b>18.5 ± 3.3a</b>    |                         | <b>6</b> |
| Chi4 unlabeled           | 5300 ± 220            | 1.7 ± 0.1         | 1.9 ± 0.04            | -                     | -                       | 4        |
| Chi4 labeled             | 770 ± 80              | 1.2 ± 0.03        | 2.8 ± 0.3             | -                     | 5.7 ± 1.6b              | 5        |
| <b>Chi4 ΔF</b>           | <b>640 ± 60</b>       | <b>1.3 ± 0.05</b> | -                     | <b>4.4 ± 0.2b</b>     |                         | <b>5</b> |
| Chi5 unlabeled           | 3840 ± 340            | 1.6 ± 0.1         | 3.2 ± 0.2             | -                     | -                       | 5        |
| Chi5 labeled             | 500 ± 40              | 2.0 ± 0.3         | 2.5 ± 0.3             | -                     | 1.2 ± 0.2a              | 5        |
| <b>Chi5 ΔF</b>           | <b>980 ± 210</b>      | <b>1.3 ± 0.02</b> | -                     | <b>23.4 ± 3.7a</b>    |                         | <b>5</b> |
| Chi6 unlabeled           | 5640 ± 250            | 1.8 ± 0.2         | 3.0 ± 0.5             | -                     | -                       | 5        |
| Chi6 labeled             | 630 ± 240             | 2.1 ± 0.4         | 2.4 ± 0.4             | -                     | 0.7 ± 0.01a             | 5        |
| <b>Chi6 ΔF</b>           | <b>1140 ± 190</b>     | <b>1.0 ± 0.2</b>  | -                     | <b>20.4 ± 3.2a</b>    |                         | <b>5</b> |
| ChiA unlabeled           | 10800 ± 610           | 1.1 ± 0.1         | 1.1 ± 0.3             | -                     | -                       | 5        |
| ChiA labeled             | 780 ± 140             | 2.0 ± 0.3         | 0.9 ± 0.1             | -                     | 3.5 ± 0.4b              | 7        |
| <b>ChiA ΔF</b>           | <b>920 ± 240</b>      | <b>0.8 ± 0.1</b>  | -                     | <b>3.1 ± 0.5b</b>     |                         | <b>7</b> |
| ChiB unlabeled           | 3650 ± 920            | 1.8 ± 0.2         | 2.4 ± 0.6             | -                     | -                       | 6        |
| ChiB labeled             | 410 ± 60              | 1.5 ± 0.2         | 2.6 ± 0.3             | -                     | 1.0 ± 0.1a              | 7        |
| <b>ChiB ΔF</b>           | <b>1150 ± 190</b>     | <b>1.3 ± 0.2</b>  | -                     | <b>21.9 ± 3.4a</b>    |                         | <b>7</b> |
| α3-R19°C,S346G unlabeled | 6420 ± 370            | 1.5 ± 0.03        | 2.1 ± 0.2             | -                     | -                       | 5        |
| α3-R19°C,S346G labeled   | 710 ± 40              | 1.4 ± 0.05        | 2.8 ± 0.3             | -                     | 1.8 ± 0.5a              | 5        |
| <b>α3-R19°C,S346G ΔF</b> | <b>880 ± 210</b>      | <b>1.3 ± 0.2</b>  | -                     | <b>6.7 ± 0.5</b>      |                         | <b>5</b> |
| α3-R19°C,S346E unlabeled | 8890 ± 280            | 1.8 ± 0.1         | 1.5 ± 0.1             | -                     | -                       | 5        |
| α3-R19°C,S346E labeled   | 800 ± 70              | 1.4 ± 0.1         | 2.4 ± 0.1             | -                     | 3.7 ± 1.1b              | 5        |
| <b>α3-19°C,S346E ΔF</b>  | <b>1230 ± 350</b>     | <b>1.1 ± 0.1</b>  | -                     | <b>2.2 ± 0.1</b>      |                         | <b>5</b> |

There was no significant difference among the EC<sub>50</sub>, n<sub>H</sub> or ΔI<sub>max</sub> data using one way ANOVA followed by Dunnett's post hoc test. A statistical analysis of ΔF<sub>max</sub> and ΔF/ΔI half decay ratio data is presented in Fig. 3.

**Table S3**

Summary of results for agonist-activated  $\Delta I$  and  $\Delta F$  responses at MTS-TAMRA-labeled N203C mutant GlyRs. Electrophysiological and fluorescence data are shown in normal and bold type, respectively.

| Construct                                                                    | EC <sub>50</sub><br>( $\mu$ M) | n <sub>H</sub>                  | I <sub>max</sub> ( $\mu$ A) | $\Delta F_{max}$ (%)            | n        |
|------------------------------------------------------------------------------|--------------------------------|---------------------------------|-----------------------------|---------------------------------|----------|
| $\alpha$ 3-N203C<br>$\Delta I$ glycine                                       | 57 $\pm$ 8                     | 2.5 $\pm$ 0.2                   | 4.9 $\pm$ 0.2               | -                               | 5        |
| <b><math>\alpha</math>3-N203C<br/><math>\Delta F</math> glycine</b>          | <b>732 <math>\pm</math> 24</b> | <b>1.0 <math>\pm</math> 0.1</b> | -                           | <b>4.0 <math>\pm</math> 0.4</b> | <b>5</b> |
| <b><math>\alpha</math>3-N203C<br/><math>\Delta F</math> strychnine</b>       | -                              | -                               | -                           | <b>5.5 <math>\pm</math> 0.3</b> | <b>5</b> |
| $\alpha$ 3-N203C-S346G<br>$\Delta I$ glycine                                 | 43 $\pm$ 5                     | 2.3 $\pm$ 0.2                   | 4.7 $\pm$ 0.2               | -                               | 5        |
| <b><math>\alpha</math>3-N203C-S346G<br/><math>\Delta F</math> glycine</b>    | <b>588 <math>\pm</math> 35</b> | <b>1.2 <math>\pm</math> 0.2</b> | -                           | <b>7.1 <math>\pm</math> 0.5</b> | <b>5</b> |
| <b><math>\alpha</math>3-N203C-S346G<br/><math>\Delta F</math> strychnine</b> | -                              | -                               | -                           | <b>8.4 <math>\pm</math> 0.2</b> | <b>5</b> |



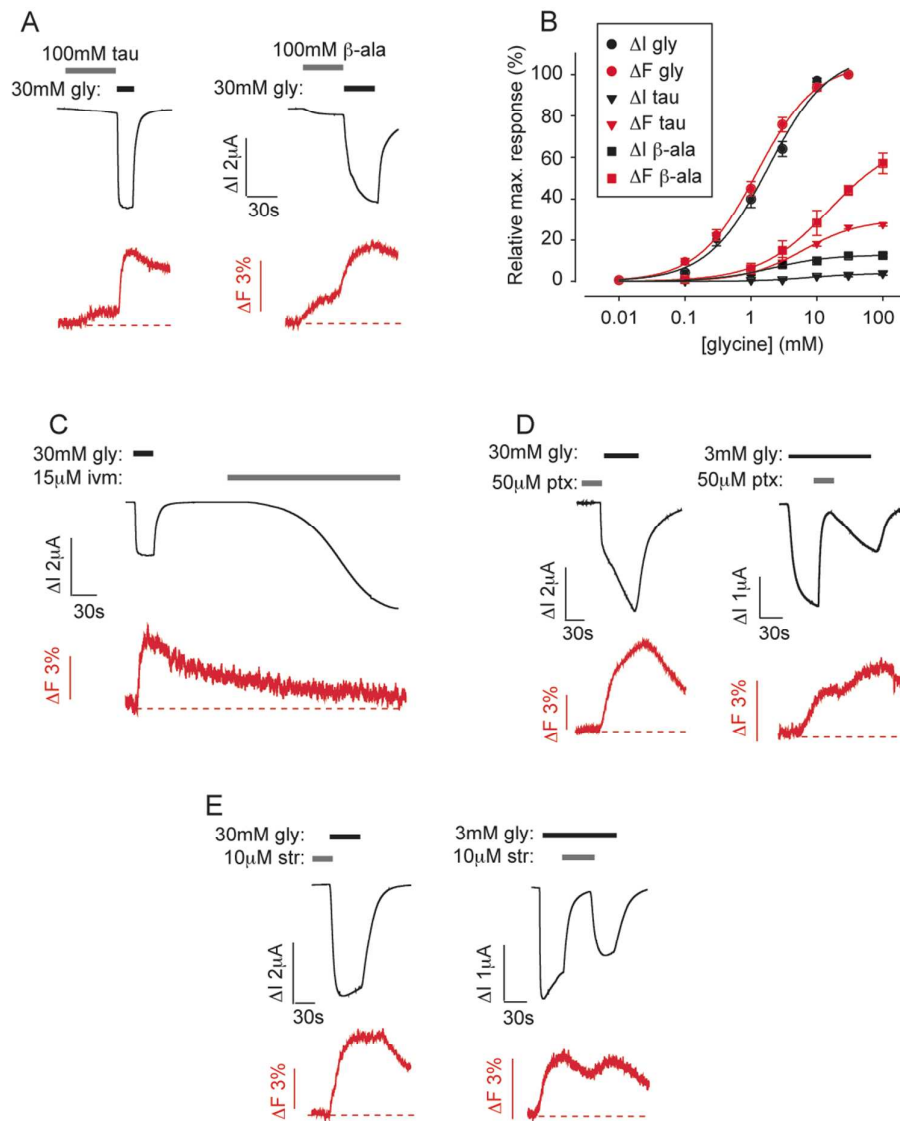

**Fig. S2.** Pharmacological characterization of MTSR-labeled  $\alpha 3$ -R19°C GlyRs. A. Sample  $\Delta I_{\max}$  and  $\Delta F_{\max}$  recordings in response to consecutive applications of saturating taurine (tau) and glycine (gly, left panel) or saturating  $\beta$ -alanine ( $\beta$ -ala) and glycine (right panel). Gray bars indicate duration of applications of taurine and  $\beta$ -alanine. B. Averaged  $\Delta I$  and  $\Delta F$  dose-response relationships for glycine, taurine and  $\beta$ -alanine. All dose-response curves are normalised to those of glycine as measured in the same oocyte. Mean parameters of best fit to all dose-response curves are presented in Table S1. C. Sample  $\Delta I_{\max}$  and  $\Delta F_{\max}$  recordings in response to saturating applications of glycine (black bar) and ivermectin (ivm, gray bar). This recording is representative of 5 others in which no detectable ivermectin-induced  $\Delta F$  was observed. D. Sample  $\Delta I_{\max}$  and  $\Delta F_{\max}$  recordings in response to the application of picrotoxin (ptx) alone (left) or co-application of  $EC_{50}$  glycine with saturating picrotoxin (right). E. Sample  $\Delta I_{\max}$  and  $\Delta F_{\max}$  recordings in response to application of strychnine (str) alone (left) or co-application of  $EC_{50}$  glycine with saturating strychnine (right). Averaged values for experiments in panels D and E are given in the main text.

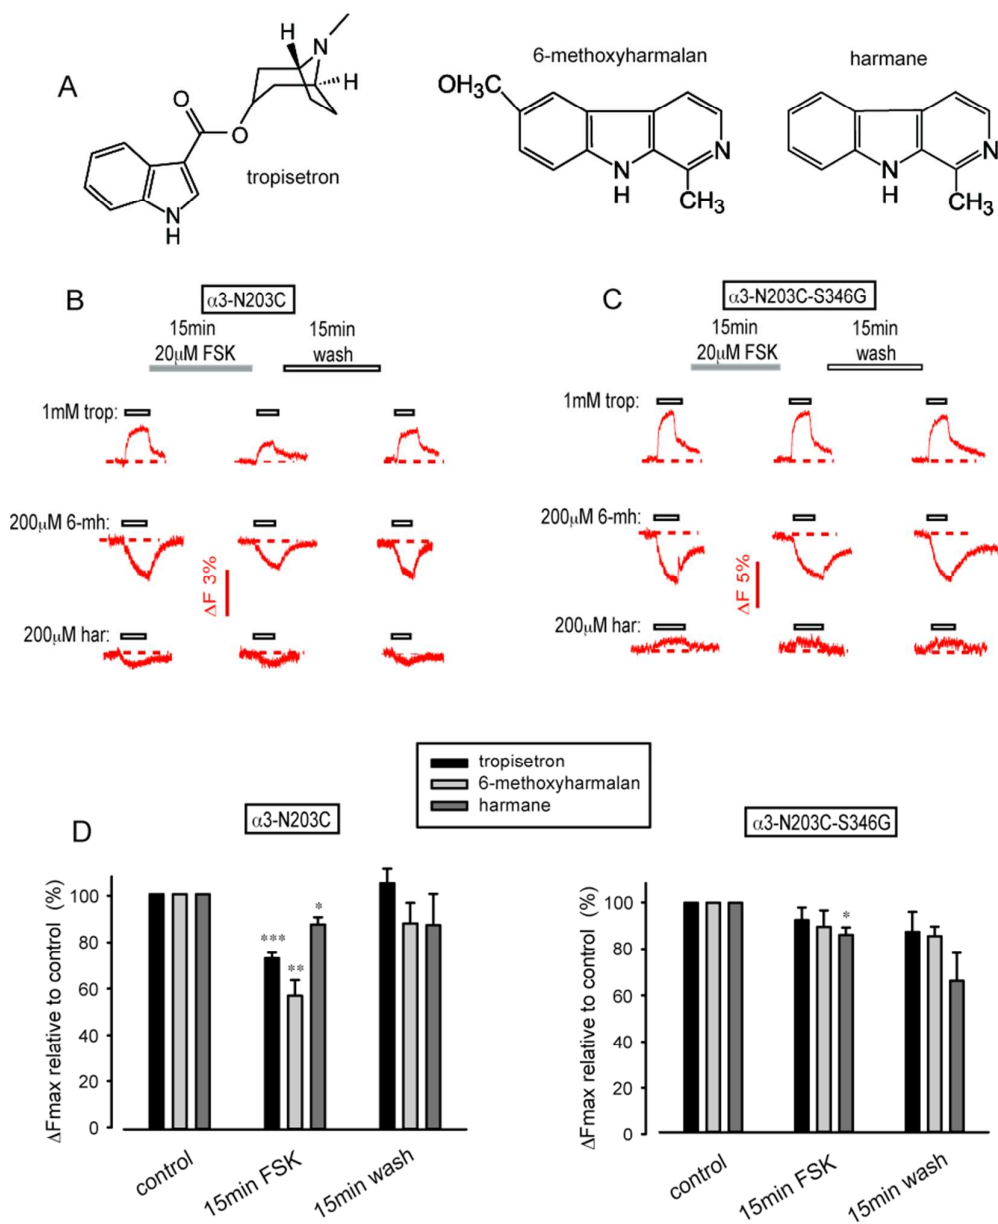

**Fig. S3.** Effects of phosphorylation on  $\Delta F_{max}$  responses induced by tropisetron, 6-methoxyharmalan and harmane in MTS-TAMRA-labeled  $\alpha 3$ -N203C GlyRs. **A.** Structures of the three molecules. **B.** Examples of  $\Delta F_{max}$  responses induced by 1 mM tropisetron (trop), 200  $\mu$ M 6-methoxyharmalan (6-mh) and 200  $\mu$ M harmane (har) on MTS-TAMRA-labeled  $\alpha 3$ -N203C GlyRs before and after a 15 min forskolin (FSK) treatment and a 15 min wash. **C.** Corresponding experiments on MTS-TAMRA-labeled  $\alpha 3$ -N203C-S346G GlyRs. **D.** Averaged data for the experiments shown in B and C (all  $n = 6$ ). \*  $p < 0.05$ , \*\*  $p < 0.01$ , \*\*\*  $p < 0.001$  relative to control using paired t-test.
